# Supplementary material
Source: publisher figshare collection journal article supplement (https://brill.figshare.com/articles/dataset/_/21564534)
Supplement: Supplementary file 1 [file 1]

# Skala zur Meta-Kognition von Zeit

Geschlecht: W\_\_ M\_\_ Alter\_\_\_\_\_

Lies die unten stehenden Aussagen durch und beurteile, in welchem Ausmaß die jeweils angegebene Aussage am ehesten auf Dich zutrifft. Wähle dabei jedes Mal eine der folgenden Antworten aus, indem Du die dazugehörige Ziffer ankreuzt:

1 – definitiv nein      2 – eher nein      3 – schwer zu sagen      4 – eher ja      5 – definitiv ja

|                                                                                                                                                             |   |   |   |   |   |
|-------------------------------------------------------------------------------------------------------------------------------------------------------------|---|---|---|---|---|
| 1. Ich kann Gedanken an Vergangenheit oder Zukunft abstellen, sofern diese mich von meiner jetzigen Tätigkeit ablenken.                                     | 1 | 2 | 3 | 4 | 5 |
| 2. Ich kann momentanen Versuchungen widerstehen, indem ich ihre zukünftigen Konsequenzen berücksichtige.                                                    | 1 | 2 | 3 | 4 | 5 |
| 3. Wenn ich mich mit Freunden treffe, kann ich oft nicht aufhören, an die Aufgaben des nächsten Tages zu denken.                                            | 1 | 2 | 3 | 4 | 5 |
| 4. Ereignisse der Zukunft können nicht mehr ändern, wie ich über die Vergangenheit denke.                                                                   | 1 | 2 | 3 | 4 | 5 |
| 5. Wenn ich wichtige Entscheidungen treffe, berücksichtige ich sowohl meine vergangenen Erfahrungen als auch meine Zukunftspläne.                           | 1 | 2 | 3 | 4 | 5 |
| 6. Bei aktuellen Vergnügungen bedenke ich die zukünftigen Folgen.                                                                                           | 1 | 2 | 3 | 4 | 5 |
| 7. Das Planen meiner Zukunft führt dazu, dass ich mich als Schmied meines eigenen Glückes fühle.                                                            | 1 | 2 | 3 | 4 | 5 |
| 8. Pläne realisiere ich, indem ich diese in konkrete Handlungen umsetze.                                                                                    | 1 | 2 | 3 | 4 | 5 |
| 9. Ich kenne Möglichkeiten, wie ich meine aktuellen Bedürfnisse und zukünftigen Ziele miteinander in Einklang bringen kann.                                 | 1 | 2 | 3 | 4 | 5 |
| 10. Die Konzentration auf die Vergangenheit oder die Zukunft lässt mich nicht im „Hier und Jetzt“ sein.                                                     | 1 | 2 | 3 | 4 | 5 |
| 11. Irgendwann werde ich anders auf Ereignisse meiner Vergangenheit zurückblicken.                                                                          | 1 | 2 | 3 | 4 | 5 |
| 12. Bewusst nutze ich meine bisherige Erfahrung, um Fehler in der Zukunft zu vermeiden.                                                                     | 1 | 2 | 3 | 4 | 5 |
| 13. Das Denken an meine Zukunft erlaubt mir manchmal meine Sichtweise auf das, was bereits passiert ist, zu verändern.                                      | 1 | 2 | 3 | 4 | 5 |
| 14. Wenn ich eine Situation beurteile, berücksichtige ich das, was mir bereits widerfahren ist sowie meine derzeitigen Erwartungen und meine Zukunftsziele. | 1 | 2 | 3 | 4 | 5 |
| 15. Wenn ich anfangs, über Gefahren nachzudenken, die mich in Zukunft erwarten, fällt es mir schwer, mich auf etwas Anderes zu konzentrieren.               | 1 | 2 | 3 | 4 | 5 |
| 16. Manchmal sorgen aktuelle Ereignisse dafür, dass ich anfangs die Vergangenheit anders zu betrachten.                                                     | 1 | 2 | 3 | 4 | 5 |
| 17. Ich weiß, was zu tun ist, wenn das Denken an die Zukunft mir keine Ruhe lässt.                                                                          | 1 | 2 | 3 | 4 | 5 |
| 18. Wenn ich bemerke, dass ich zu viel über die Vergangenheit nachdenke, gelingt es mir, in die Gegenwart zurückzukehren.                                   | 1 | 2 | 3 | 4 | 5 |
| 19. Ich mache Zukunftspläne, indem ich berücksichtige, was mich das Leben diesbezüglich bereits gelehrt hat.                                                | 1 | 2 | 3 | 4 | 5 |
| 20. Ich widerstehe erfolgreich verschiedenen Versuchungen, indem ich mir die zukünftigen Folgen meines Handelns vor Augen führe.                            | 1 | 2 | 3 | 4 | 5 |
| 21. Ich weiß, wie ich Gedanken beherrschen kann, die mich daran hindern, im „Hier und Jetzt“ zu sein.                                                       | 1 | 2 | 3 | 4 | 5 |
| 22. Wenn ich es will, kann ich mich völlig dem Erleben der aktuellen Situation hingeben.                                                                    | 1 | 2 | 3 | 4 | 5 |
| 23. Ich weiß, dass ich meine Sichtweise auf die Ereignisse der Vergangenheit ändern kann.                                                                   | 1 | 2 | 3 | 4 | 5 |
| 24. Ich weiß, was ich tun kann, wenn mich Erinnerungen daran hindern, mich auf das Ausüben einer aktuellen Tätigkeit zu konzentrieren.                      | 1 | 2 | 3 | 4 | 5 |
| 25. Wenn ich anfangs, über meine Vergangenheit nachzudenken, fällt es mir schwer, mich auf irgendetwas anderes zu konzentrieren.                            | 1 | 2 | 3 | 4 | 5 |
| 26. Der Lauf der Zeit lässt mich manche Ereignisse aus einer anderen Perspektive heraus betrachten.                                                         | 1 | 2 | 3 | 4 | 5 |

## Scoring key for the German and English versions of the TMCS

Reverse items:

3, 4, 10, 15, 25

Metacognitive Temporal Control 1,3, 10, 15, 17, 18, 21, 22, 24, 25

Cognitive Reconstruction of the Past 4, 11, 13, 16, 23, 26

Goal-oriented Metatemporal Interconnectedness 2, 5, 6, 7, 8, 9, 12, 14, 19, 20
