# Supplementary material
Source: publisher figshare collection journal article supplement (https://brill.figshare.com/articles/dataset/_/21564534)
Supplement: Supplementary file 2 [file 1]

# Temporal Metacognition Scale

(M. Stolarski & J. Witowska)

Read each item and, as honestly as you can, answer the question: "How characteristic or true is this of you?" Check the appropriate box using the scale. Please answer ALL of the following questions on both sides.

1 – *Very untrue*

2 – *Untrue*

3 – *Neutral*

4 – *True*

5 – *Very true*

|                                                                                                                            |   |   |   |   |   |
|----------------------------------------------------------------------------------------------------------------------------|---|---|---|---|---|
| 1. I am able to 'turn off' my thoughts about the past or the future if they distract me from my present activity.          | 1 | 2 | 3 | 4 | 5 |
| 2. I am able to resist immediate temptations because I take into account their future consequences.                        | 1 | 2 | 3 | 4 | 5 |
| 3. When I meet up with my friends I often can't stop thinking about my duties of the next day.                             | 1 | 2 | 3 | 4 | 5 |
| 4. No event in my future will change the way I perceive my past.                                                           | 1 | 2 | 3 | 4 | 5 |
| 5. While making important decisions I take into account both my past experiences and my future goals.                      | 1 | 2 | 3 | 4 | 5 |
| 6. I take into account the future consequences of the pleasures that I currently indulge in.                               | 1 | 2 | 3 | 4 | 5 |
| 7. Planning for the future makes me feel like an architect of my own fate.                                                 | 1 | 2 | 3 | 4 | 5 |
| 8. I translate my plans into specific actions that lead to attainment of my goals.                                         | 1 | 2 | 3 | 4 | 5 |
| 9. I know how to balance my current desires with my future goals.                                                          | 1 | 2 | 3 | 4 | 5 |
| 10. Focus on the past or on the future prevents me from being aware of 'here and now'.                                     | 1 | 2 | 3 | 4 | 5 |
| 11. Someday I will look at the events from my past in another way.                                                         | 1 | 2 | 3 | 4 | 5 |
| 12. I consciously use my past experience to avoid making mistakes in the future.                                           | 1 | 2 | 3 | 4 | 5 |
| 13. Reflecting on my future sometimes changes my point of view on what has already happened.                               | 1 | 2 | 3 | 4 | 5 |
| 14. To assess the current situation, I take into account my past experience, my present expectations, and my future goals. | 1 | 2 | 3 | 4 | 5 |
| 15. When I start to think about future threats I find it difficult to concentrate on anything else.                        | 1 | 2 | 3 | 4 | 5 |
| 16. Sometimes current events make me change my point of view on what was in the past.                                      | 1 | 2 | 3 | 4 | 5 |
| 17. I know what to do when thinking of the future bothers me.                                                              | 1 | 2 | 3 | 4 | 5 |
| 18. When I recognize that I focus too much on dwelling on the past, I am able to get back to the current moment.           | 1 | 2 | 3 | 4 | 5 |
| 19. I formulate future plans taking into account what life has taught me so far about current matters.                     | 1 | 2 | 3 | 4 | 5 |
| 20. I effectively overcome various temptations by imagining future consequences of my actions.                             | 1 | 2 | 3 | 4 | 5 |
| 21. I know how to control thoughts that could prevent me from being aware of the 'here and now'.                           | 1 | 2 | 3 | 4 | 5 |
| 22. If I want, I am able to immerse myself entirely in the experience of the present moment.                               | 1 | 2 | 3 | 4 | 5 |
| 23. I know that I can change my point of view on events from the past.                                                     | 1 | 2 | 3 | 4 | 5 |
| 24. I know what to do when memories do not allow me to concentrate on current activity.                                    | 1 | 2 | 3 | 4 | 5 |
| 25. When I start to think of my past, it is hard for me to focus on anything else.                                         | 1 | 2 | 3 | 4 | 5 |
| 26. The passage of time makes me see certain events from a different perspective.                                          | 1 | 2 | 3 | 4 | 5 |
