# Supplementary material
Source: publisher figshare collection journal article supplement (https://brill.figshare.com/articles/dataset/_/21564534)
Supplement: Supplementary file 3 [file 1]

# **Psychometric Validation of the German Adaptation of the Temporal Metacognition Scale**

**Joanna Witowska<sup>1,\*</sup>, Maciej Stolarski<sup>2</sup> and Marc Wittmann<sup>3</sup>**

<sup>1</sup>Institute of Psychology, The Maria Grzegorzewska University, 02-353 Warsaw, Poland

<sup>2</sup>Department of Psychometrics and Psychological Diagnosis, University of Warsaw, 00-183 Warsaw, Poland

<sup>3</sup>Institute for Frontier Areas in Psychology and Mental Health, 79098 Freiburg, Germany

\*Corresponding author; e-mail: jwitowska@aps.edu.pl

ORCID iDs: Witowska: 0000-0002-9063-049X; Wittmann: 0000-0002-4483-7334

**Supplementary material**
